# Supplementary material
Source: Elsevier journal article supplement (https://www.sciencedirect.com/science/article/pii/S2531043721001963)
Supplement: mmc1 [file S2531043721001963:mmc1.docx]

|  | **Endpoint not met** | | **Endpoint met** | |
| --- | --- | --- | --- | --- |
| Score | n= | % | n= | % |
| 0 | 107 | 87.0% | 16 | 13.0% |
| 1 | 89 | 65.0% | 48 | 35.0% |
| 2–3 | 103 | 50.7% | 100 | 49.3% |
| ≥4 | 17 | 25.8% | 49 | 74.2% |

Supplementary Table 1: Comparison of events per each R4 category within the total population.

| **R4 components** | Sensitivity | Specificity | AUC |
| --- | --- | --- | --- |
| Age (≥63) | 47% | 75% | 0.62 |
| Low eGFR (<60) | 24% | 88% | 0.56 |
| ROX-24 (≤5.2) | 78% | 32% | 0.63 |
| History of hypertension | 51% | 69% | 0.60 |
| History of diabetes | 36% | 75% | 0.56 |
| Any comorbidity | 21% | 90% | 0.56 |
| **R4 category (# of criteria)** | Sensitivity | Specificity | AUC |
| 1 (0) | 100% | 0% | 0.72 |
| 2 (1) | 92% | 34% |
| 3 (2–3) | 70% | 62% |
| 4 (≥4) | 23% | 95% |

Supplementary Table 2: Sensitivity and specificity for the primary endpoint by each R4 score criterion individually and by the proposed R4 score categories.


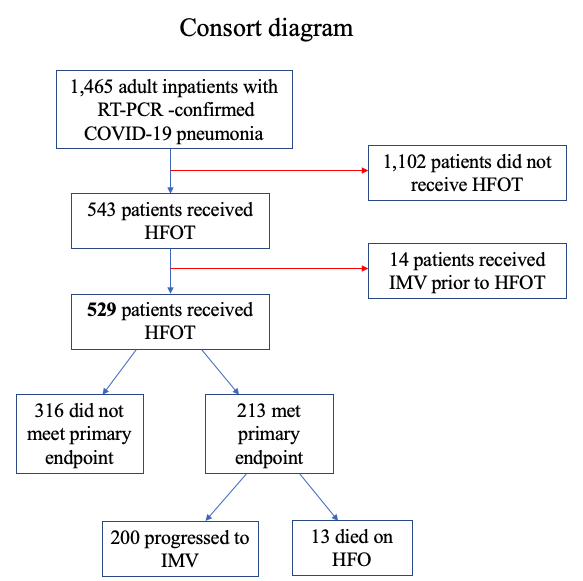


Supplementary Figure 1: Consort diagram of the population included in the analysis. Red lines imply exclusion from analysis.


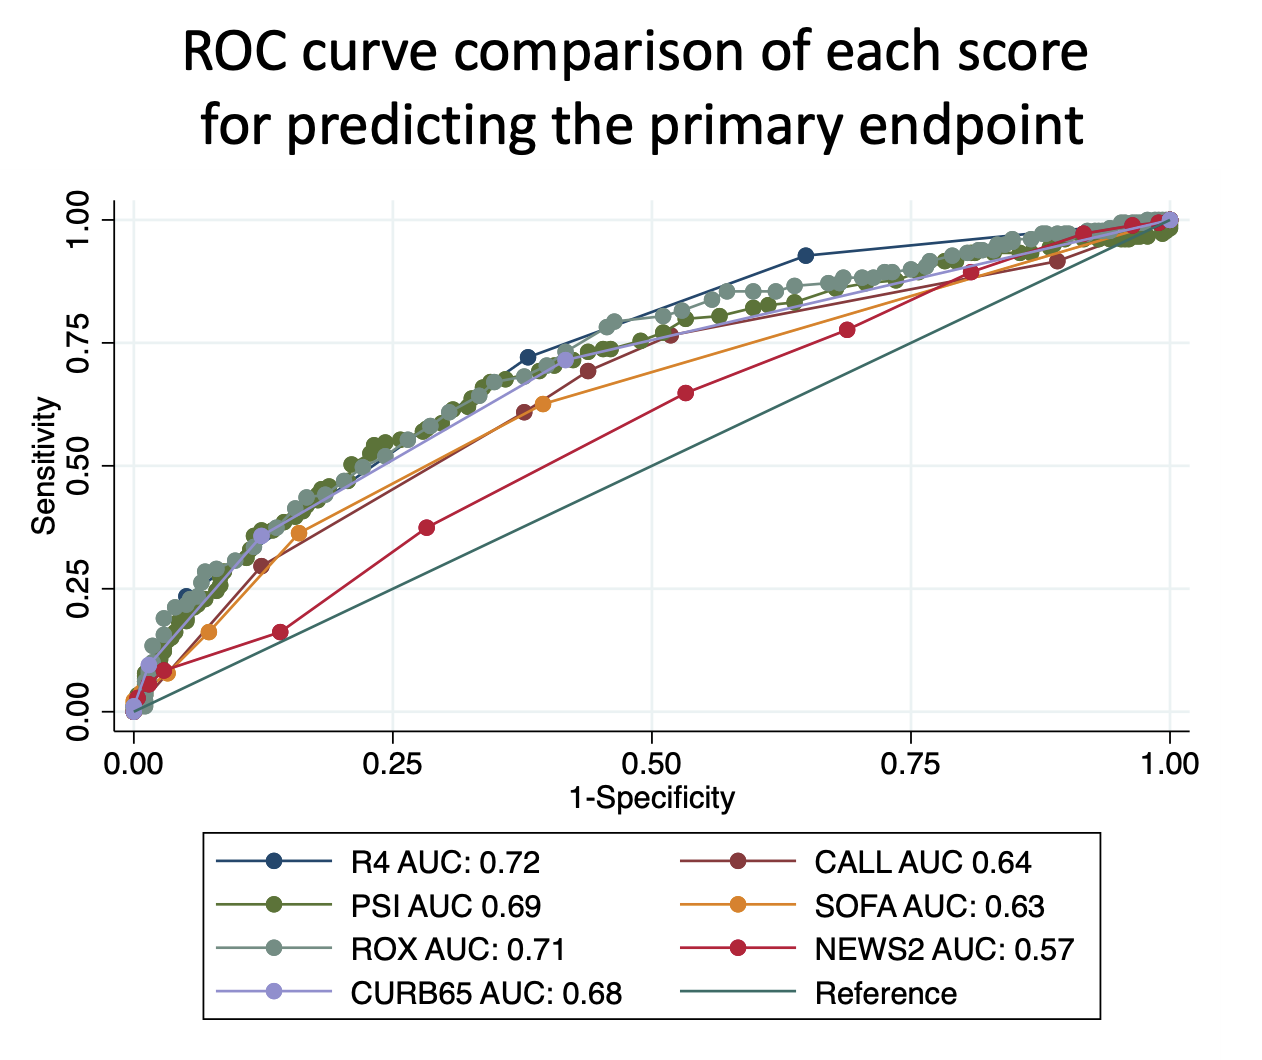


Supplementary Figure 2: Receiver operating characteristic (ROC) curve for the R4 score compared to other traditional scores for predicting our primary endpoint. Using Bonferroni-adjusted chi2, other traditional scores performed similarly to the R4 score (p= 0.001, 0.206, 0.005, 0.647, 0.001, and 0.113 for CALL, PSI, SOFA, ROX, NEWS2, and CURB-65, respectively).
